# Supplementary material
Source: Springer Nature journal article supplement (https://www.springermedizin.de/resource/supplementary/13601_2013_430_MOESM6_ESM.pdf/9677878)
Supplement: MOESM6 [file 9677878]

(No initial IgE Skin Prick Tests or Serum Specific IgE Assays necessary)

**Exclusively Breast-Fed**

**Strict Exclusion of cow's milk containing foods from Maternal Diet**  
Maternal supplements of Calcium (1000mg) and Vitamin D (10mcg) daily  
Refer to dietician  
If CMA - most symptoms will settle well within the agreed 2-4 week Elimination Diet

**No Improvement**      **Improvement - need to confirm Diagnosis**

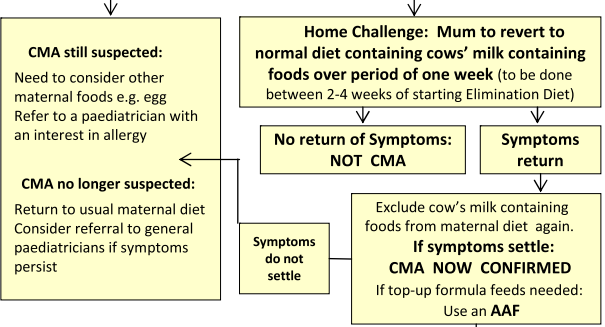

**Formula-Fed or 'Mixed Feeding' (Breast and Formula)**

**Strict Cow's Milk Protein free Diet**

Formula-fed - Trial of an **Extensively Hydrolysed Formula (eHF)** in infant  
Mixed feeding - Trial of a cow's milk free Maternal Diet  
With eHF top-ups for infant if needed  
Refer to dietician  
If CMA - most symptoms will settle well within the agreed 2-4 week Elimination Diet

**Improvement - need to confirm Diagnosis**      **No Improvement**

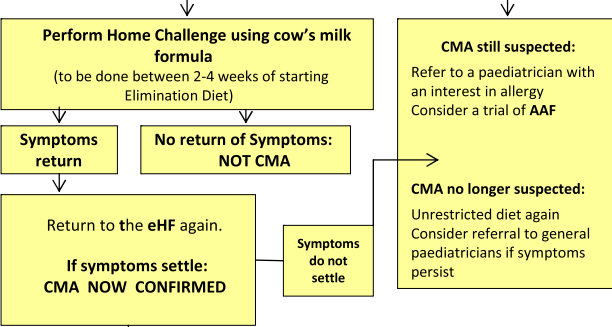

Cow's milk free diet until 9-12 months of age and for at least 6 months – with support of dietician  
**A planned Reintroduction or Supervised Challenge** is then needed to determine if tolerance has been achieved  
Performing a Reintroduction vs. a Supervised Challenge is dependent on the answer to the question:  
Does the child have **Current Eczema** or **ANY history at ANY time of acute onset symptoms**?

**No Current Eczema**  
**And no history at any stage of acute onset symptoms**  
(No need to check Serum Specific IgE or perform Skin Prick Test)  
**Reintroduction at Home** to test for Tolerance

**Current Eczema**  
Check Serum Specific IgE or Skin Prick Test to cow's milk

**History of acute onset symptoms at any time**  
Serum Specific IgE or Skin Prick Test needed

**Negative**      **Positive**  
Liaise with local Allergy Service Re: Challenge (or tests not available)

**And still no history at any stage of acute onset symptoms**  
**Reintroduction at Home** to test for Tolerance

**Negative**      **Positive**

**Refer to a paediatrician with an interest in allergy**  
(A **Supervised Challenge** may be needed)
